# Supplementary material for: Structural isomerism engineering regulates molecular AIE behavior and application in visualizing endogenous hydrogen sulfide
Source: Royal Society of Chemistry journal article supplement (doi:10.1039/d4tb01617c), 2024-01-01
Supplement: d4tb01617c1.pdf [file d4tb01617c1.pdf]

*Electronic Supporting Information*

**Structural isomerism engineering regulates molecular AIE  
behavior and application in visualizing endogenous hydrogen  
sulfide**

Yaxi Li<sup>a,1</sup>, Yong-Xiang Wang<sup>b,1</sup>, Dujuan Liu<sup>a</sup>, Chen-Chieh Ni<sup>b</sup>,  
Jianming Ni,<sup>a</sup> and Jen-Shyang Ni<sup>b,\*</sup>

<sup>a</sup> *Department of Radiology, Jiangnan University Medical Center (JUMC), Wuxi  
214002, China*

<sup>b</sup> *Department of Chemical and Materials Engineering, Photo-sensitive Material  
Advanced Research and Technology Center (Photo-SMART), National  
Kaohsiung University of Science and Technology, Kaohsiung 80778, Taiwan*

<sup>1</sup> *These authors contributed equally to this work.*

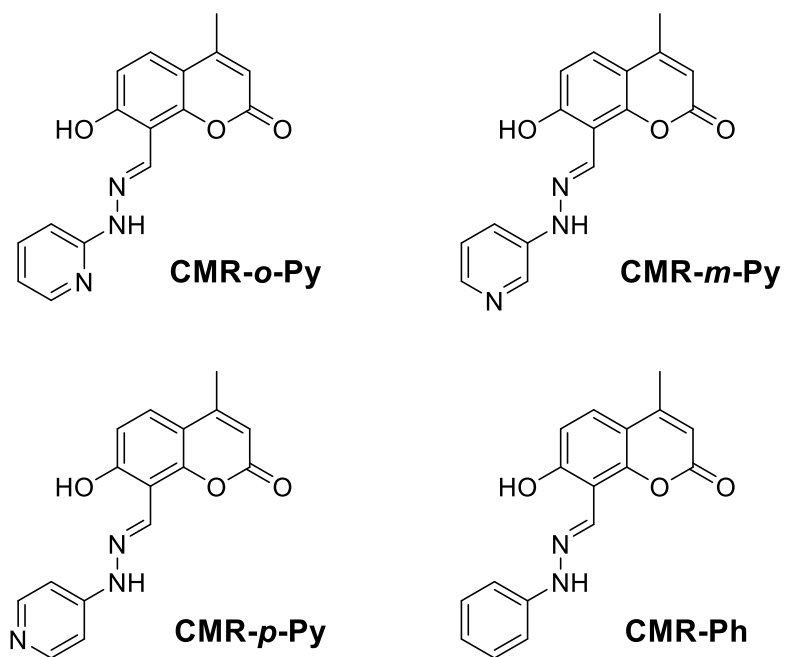

**Scheme S1.** The chemical structures of coumarin-based materials.

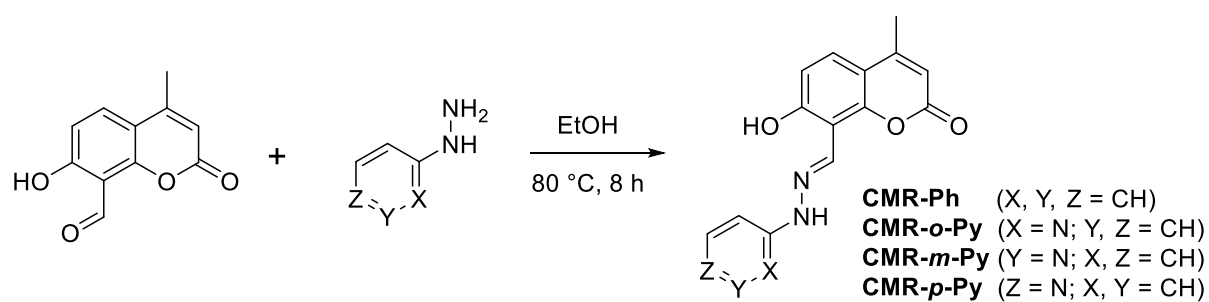

**Scheme S2.** The synthesis route of coumarin-based materials.

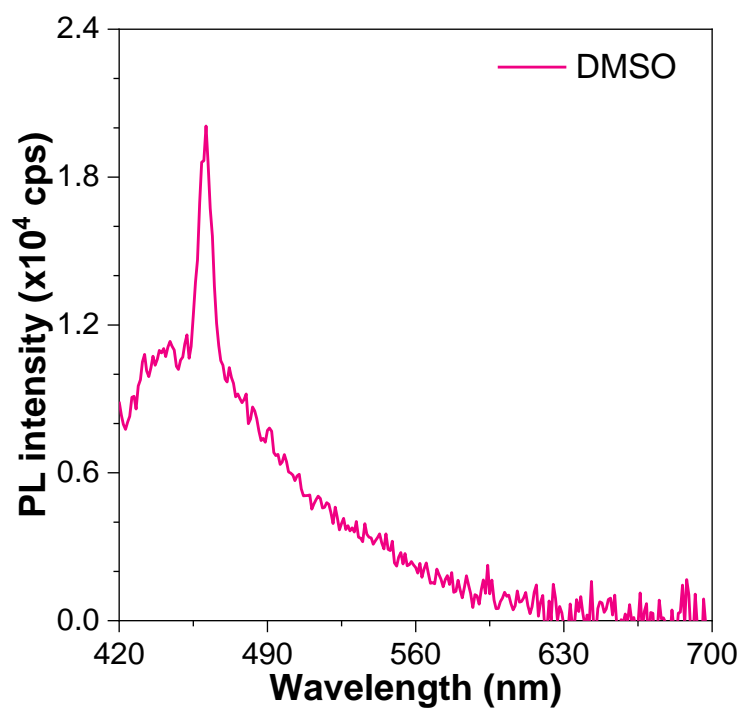

**Figure S1.** The PL spectra of DMSO solvent. Excitation wavelength: 400 nm; Slit: 5 nm.

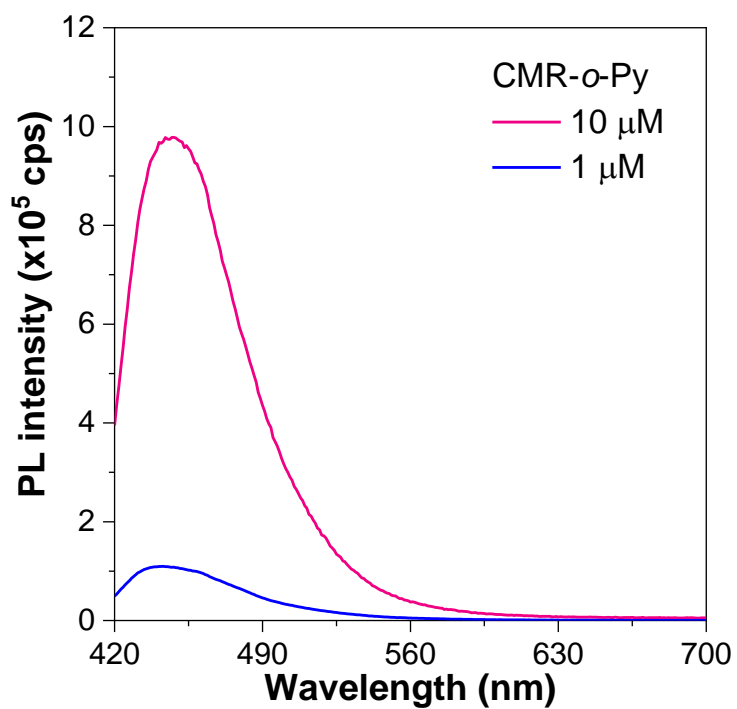

**Figure S2.** The PL spectra of CMR-*o*-Py in DMSO at the concentrations of 1 and 10 μM, respectively. Excitation wavelength: 400 nm; Slit: 5 nm.

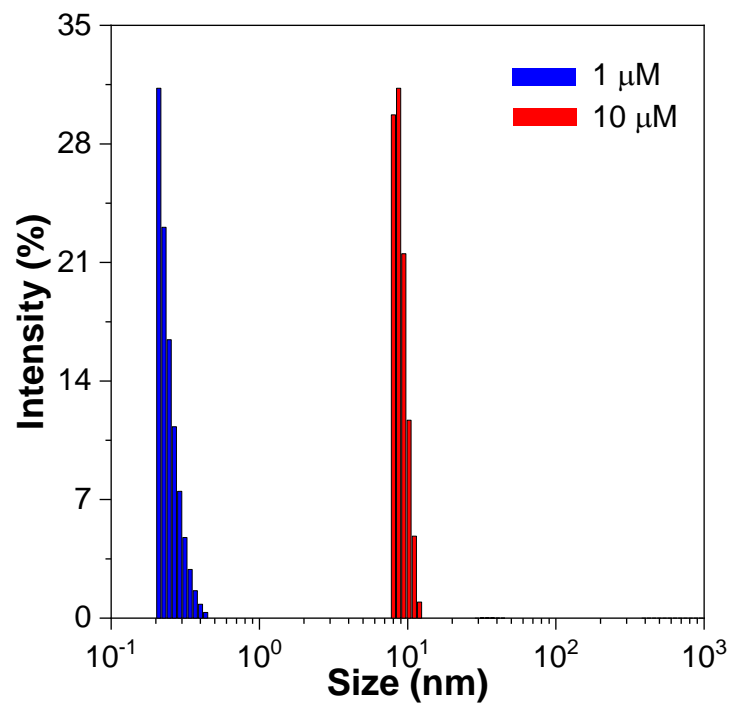

**Figure S3.** The DLS spectra of CMR-*o*-Py in DMSO at the concentrations of 1 and 10  $\mu\text{M}$ , respectively.

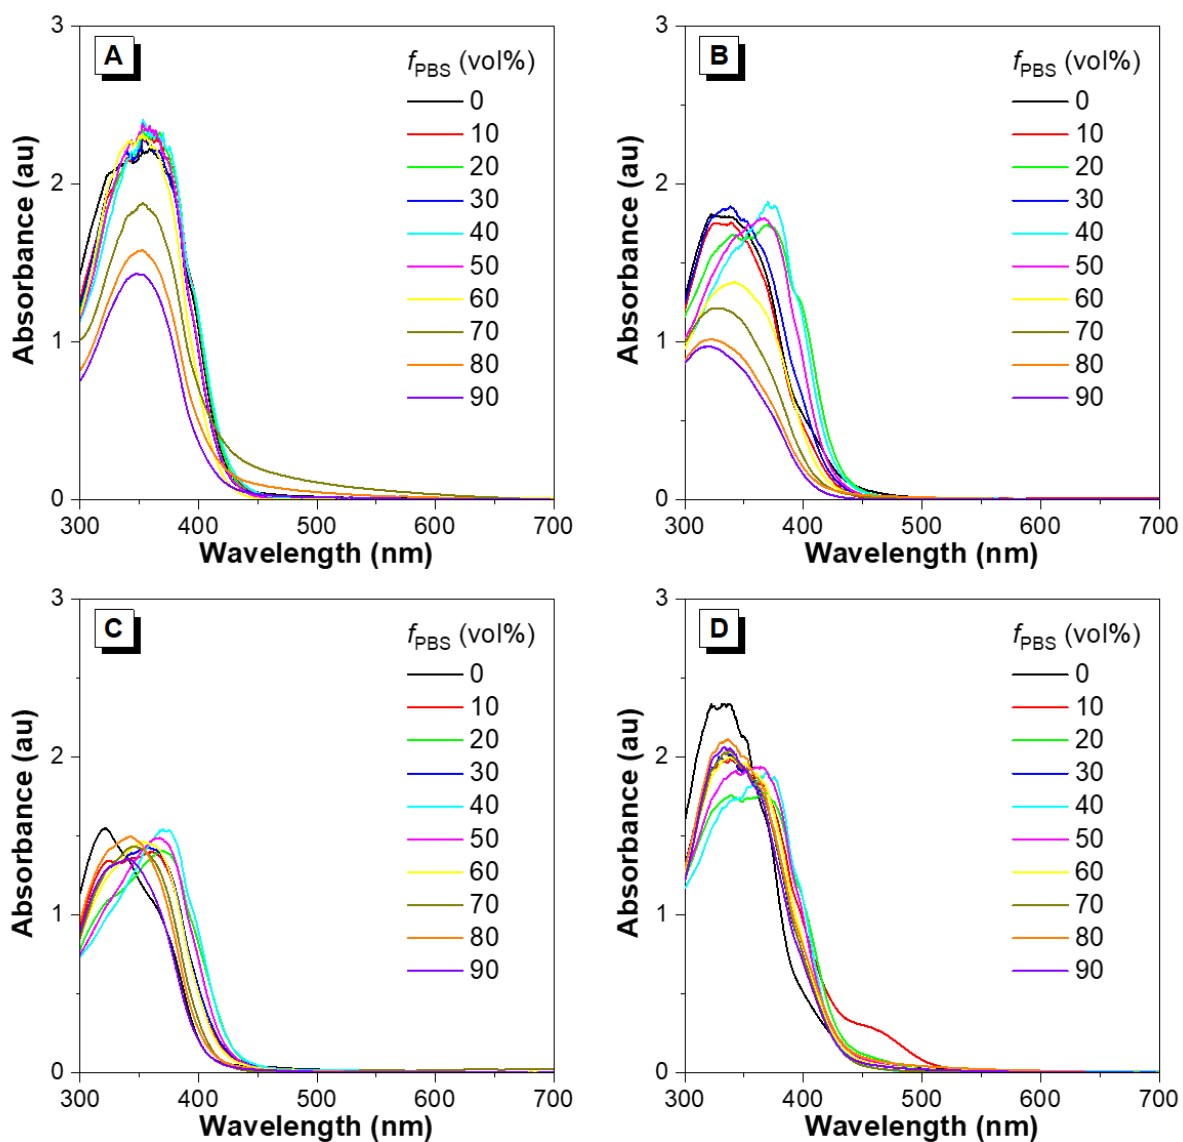

**Figure S4.** UV-vis absorption spectra of (A) CMR-Ph, (B) CMR-*o*-Py, (C) CMR-*m*-Py, and (D) CMR-*p*-Py in DMSO/PBS mixture solution (100  $\mu\text{M}$ ) with different PBS fractions ( $f_{\text{PBS}}$ ).

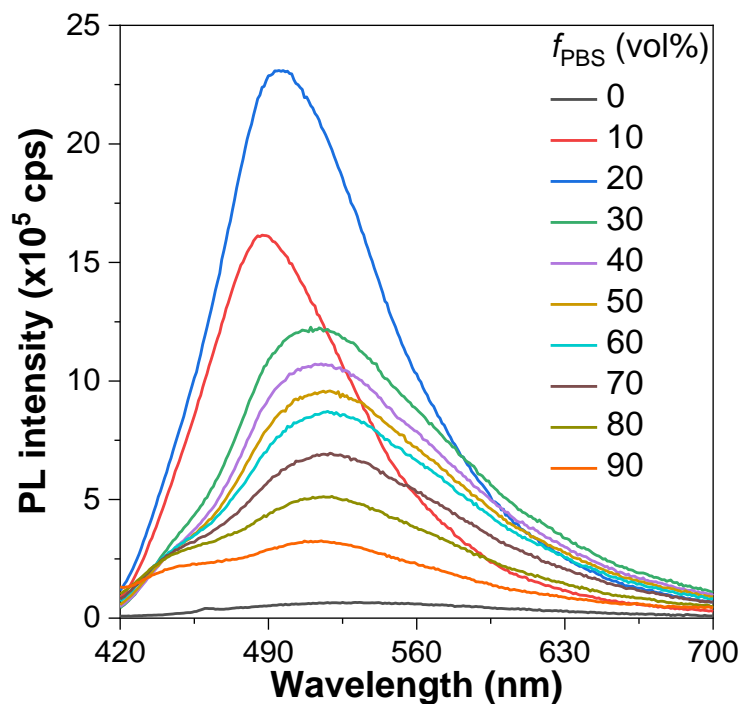

**Figure S5.** PL spectra of CMR-*m*-Py in DMSO/PBS mixture solution with different PBS fractions ( $f_{\text{PBS}}$ ) at a concentration of 100  $\mu\text{M}$ . Excitation wavelength: 405 nm; excitation slit: 1 nm; emission slit: 5 nm.

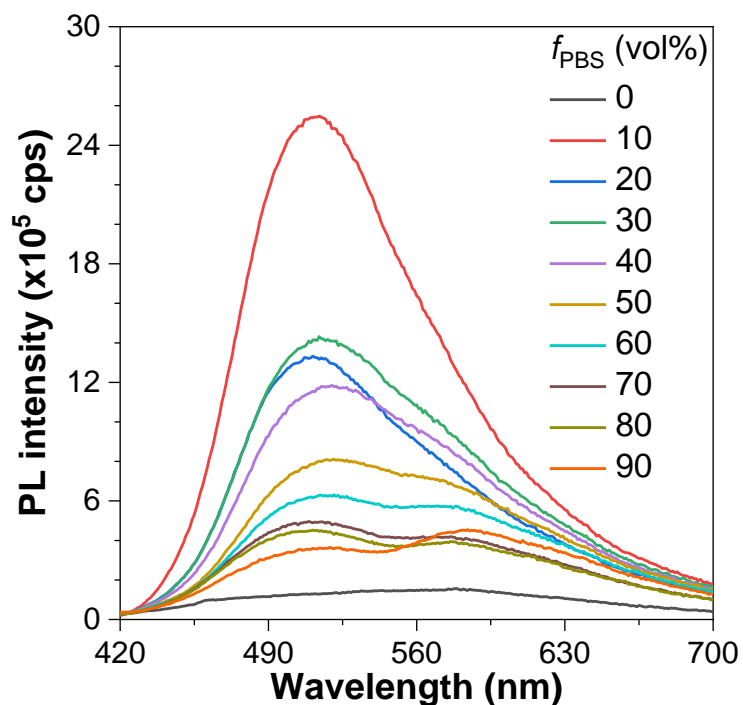

**Figure S6.** PL spectra of CMR-*p*-Py in DMSO/PBS mixture solution with different  $f_{\text{PBS}}$  (100  $\mu\text{M}$ ). Excitation wavelength: 405 nm; excitation slit: 1 nm; emission slit: 5 nm.

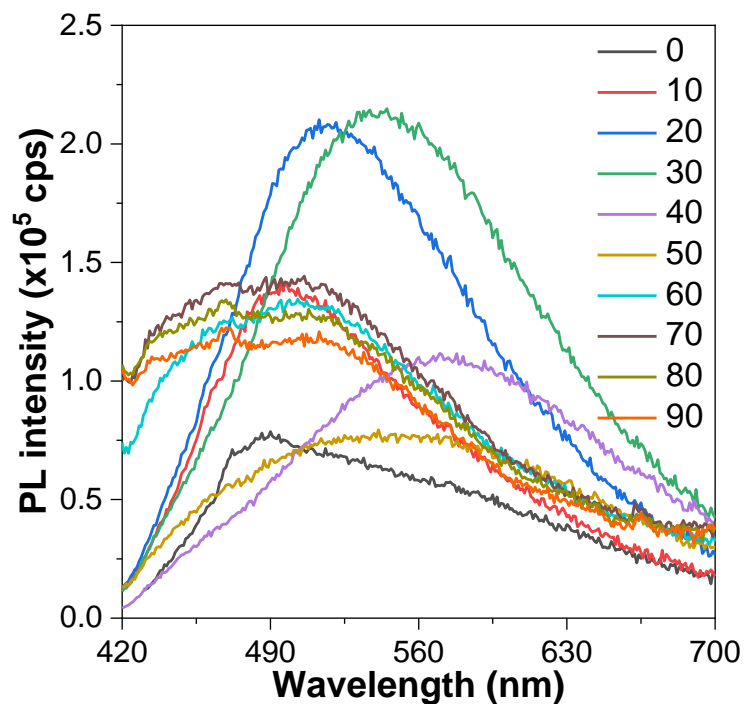

**Figure S7.** PL spectra of CMR-Ph in DMSO/PBS mixture solution with different  $f_{\text{PBS}}$  (100  $\mu\text{M}$ ). Excitation wavelength: 405 nm; excitation slit: 1 nm; emission slit: 5 nm.

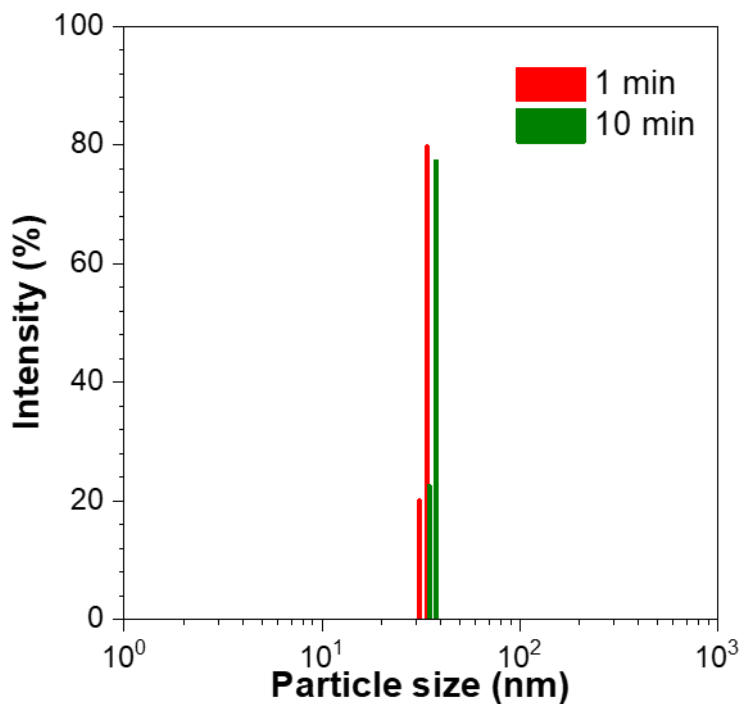

**Figure S8.** The DLS analysis of CMR-o-Py nanoaggregates in 90 vol% PBS solution (100  $\mu\text{M}$ ) after 1 and 10 min sitting, respectively.

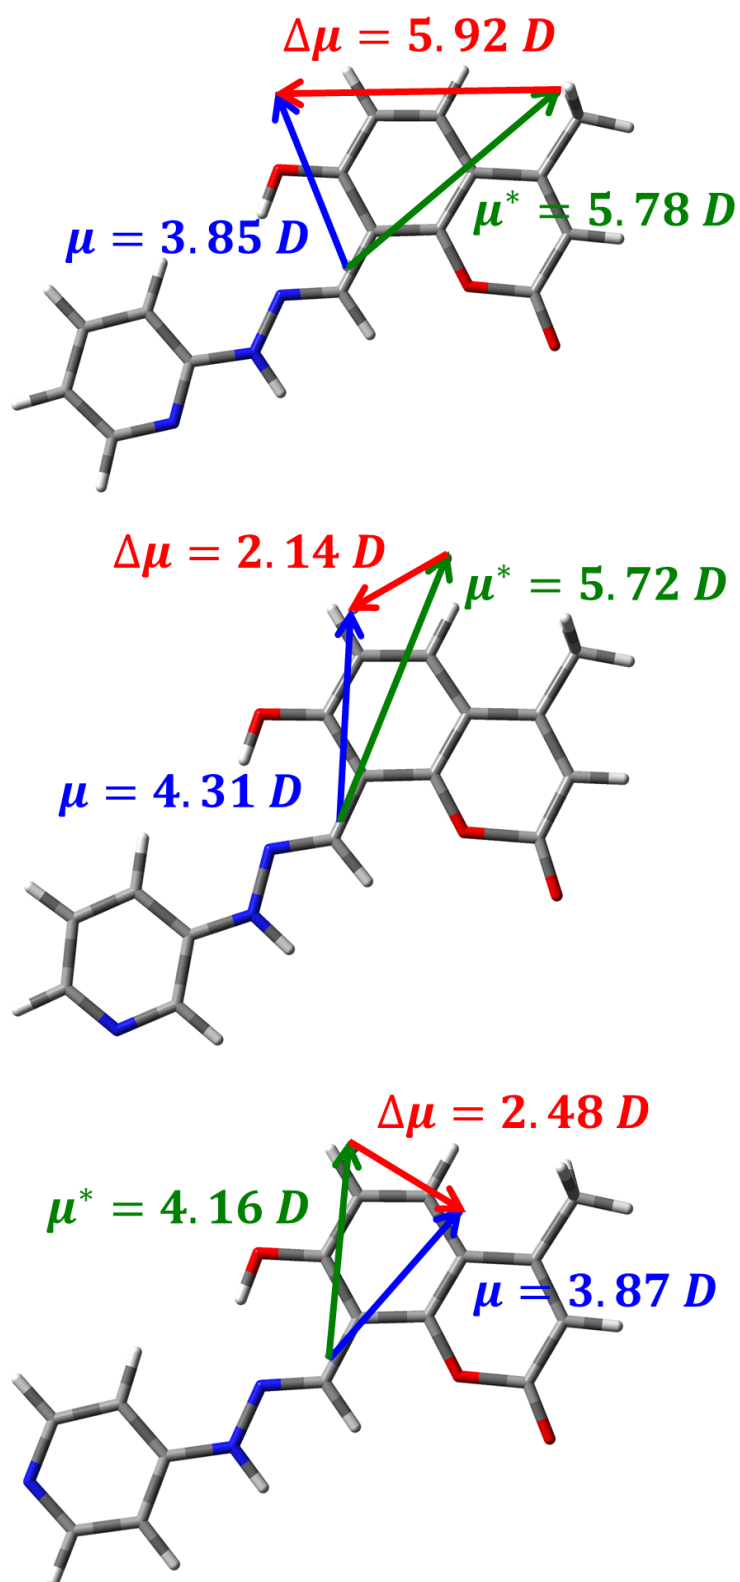

**Figure S9.** The dipole moment of CMR-*o*-Py, CMR-*m*-Py, and CMR-*p*-Py, respectively, calculated with TD-DFT using B3LYP functional with a 6-31G(d) basis set.  $\mu$  and  $\mu^*$  are dipole moments of the ground and excited states, respectively.  $\Delta\mu$  is the difference value between  $\mu$  and  $\mu^*$ .



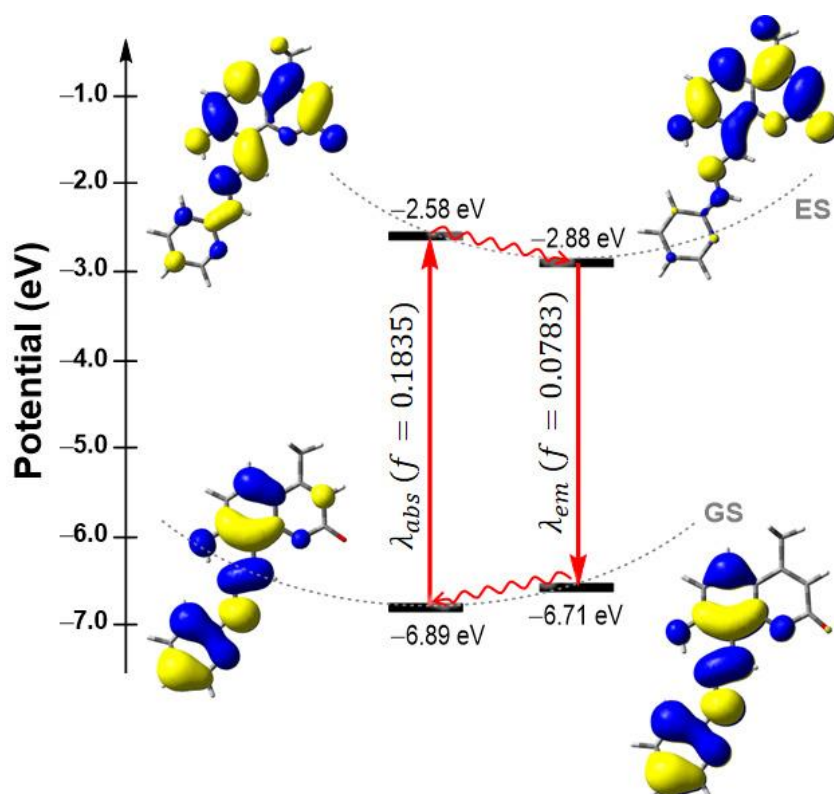

**Figure S10.** The frontier molecular orbitals and their relative energy levels of CMR-*o*-Py in the ground and excited states. GS: ground state. ES: excited state.

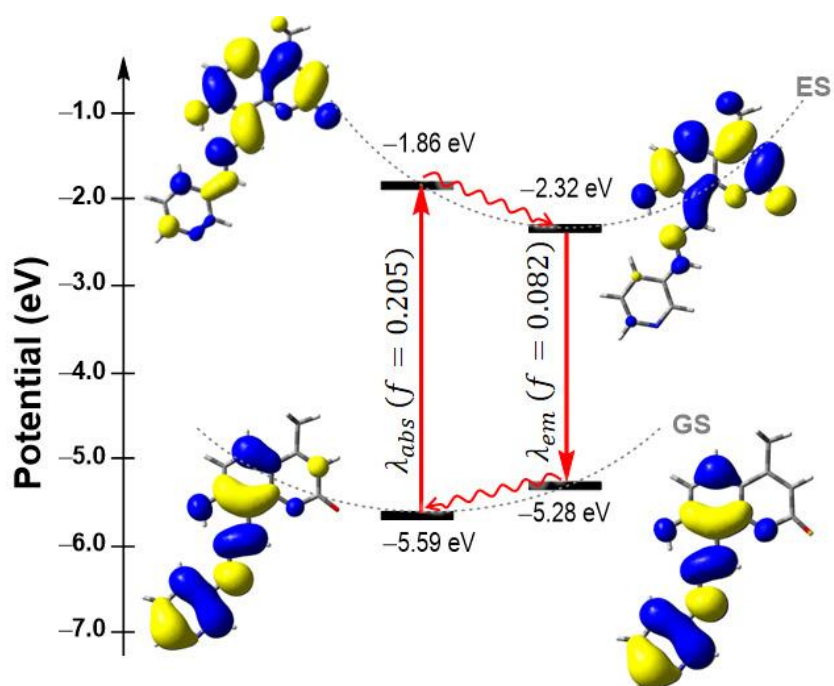

**Figure S11.** The frontier molecular orbitals and their relative energy levels of CMR-*m*-Py in the ground and excited states. GS: ground state. ES: excited state.

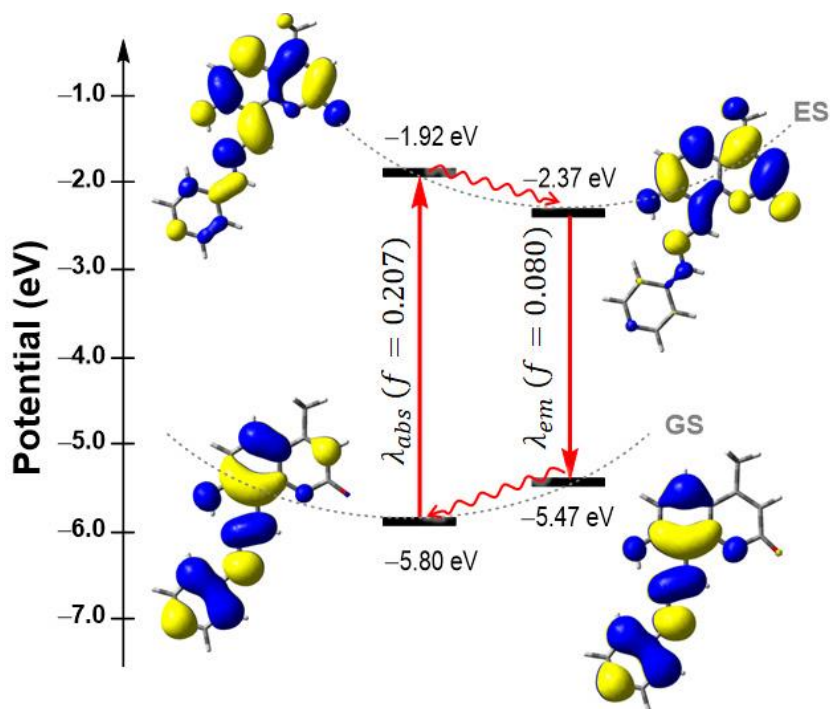

**Figure S12.** The frontier molecular orbitals and their relative energy levels of CMR-*p*-Py in the ground and excited states. GS: ground state. ES: excited state.

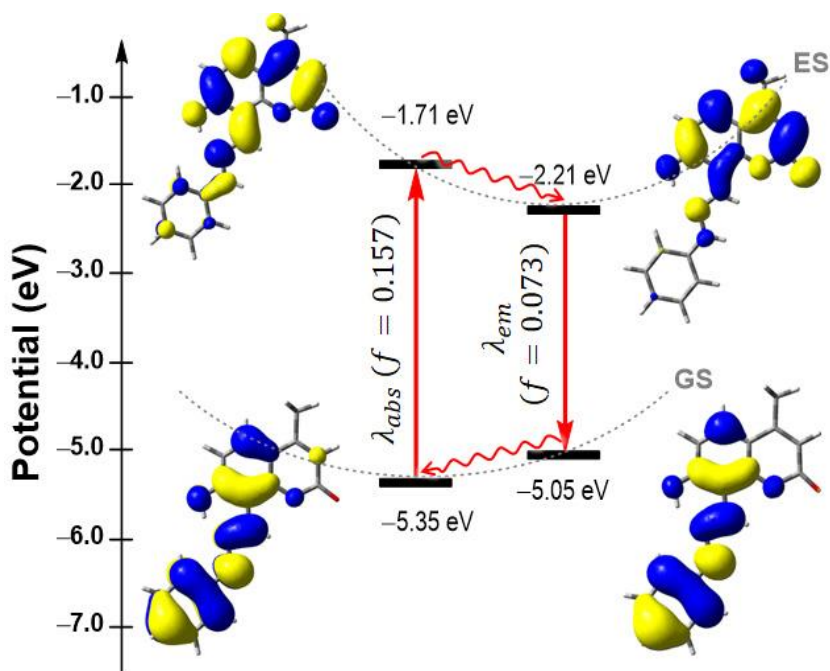

**Figure S13.** The frontier molecular orbitals and their relative energy levels of CMR-Ph in the ground and excited states. GS: ground state. ES: excited state.

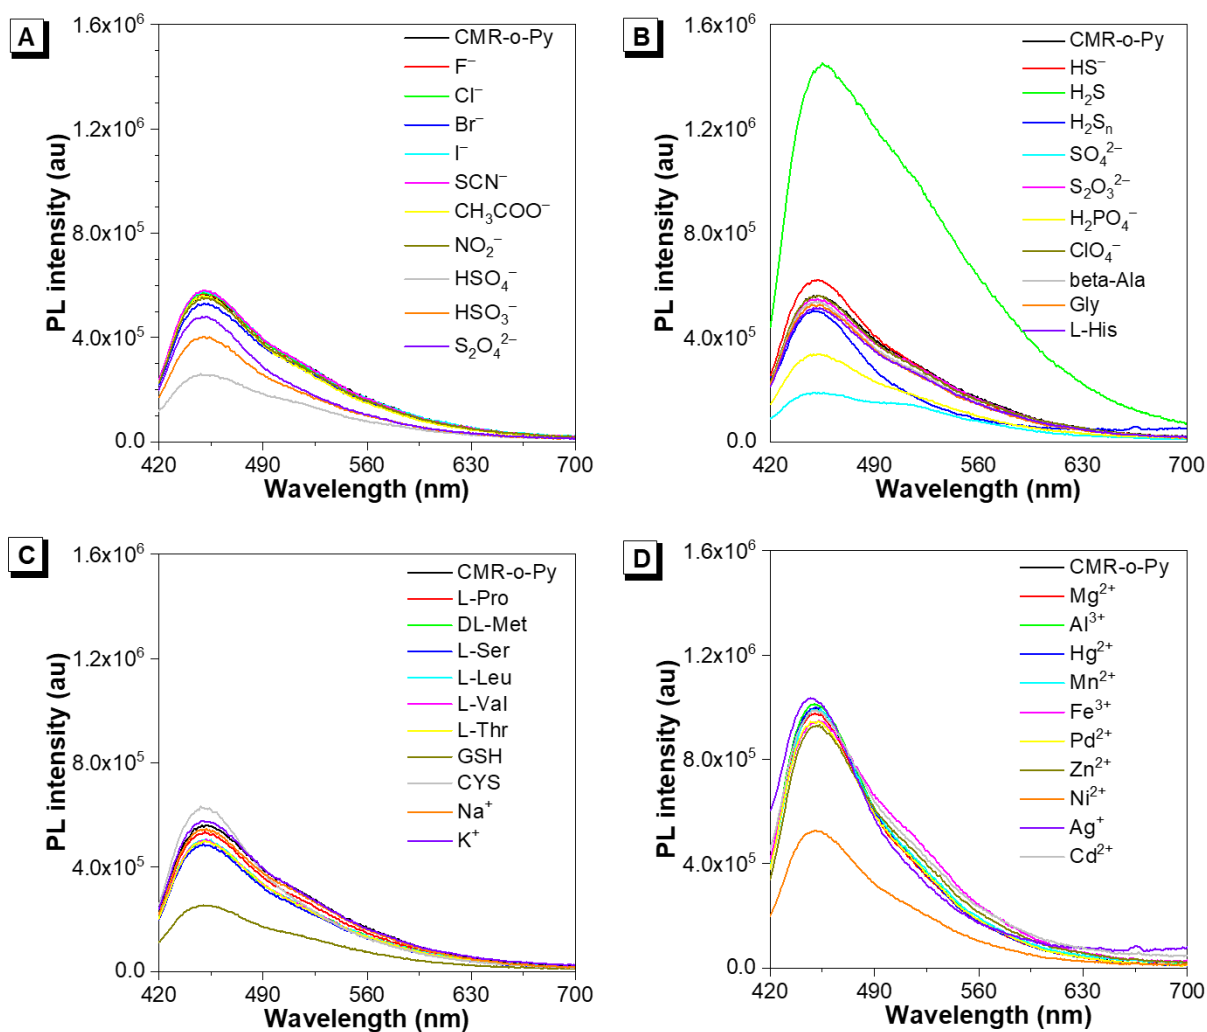

**Figure S14.** PL spectra of CMR-*o*-Py nanoaggregates in DMSO/PBS (1/9, v/v; pH = 7.4) mixture solutions (100  $\mu$ M) with different sulfide substances, amino acids, anions, and metal ions (1 mM). Excitation wavelength: 405 nm; excitation slit: 1 nm; emission slit: 5 nm.

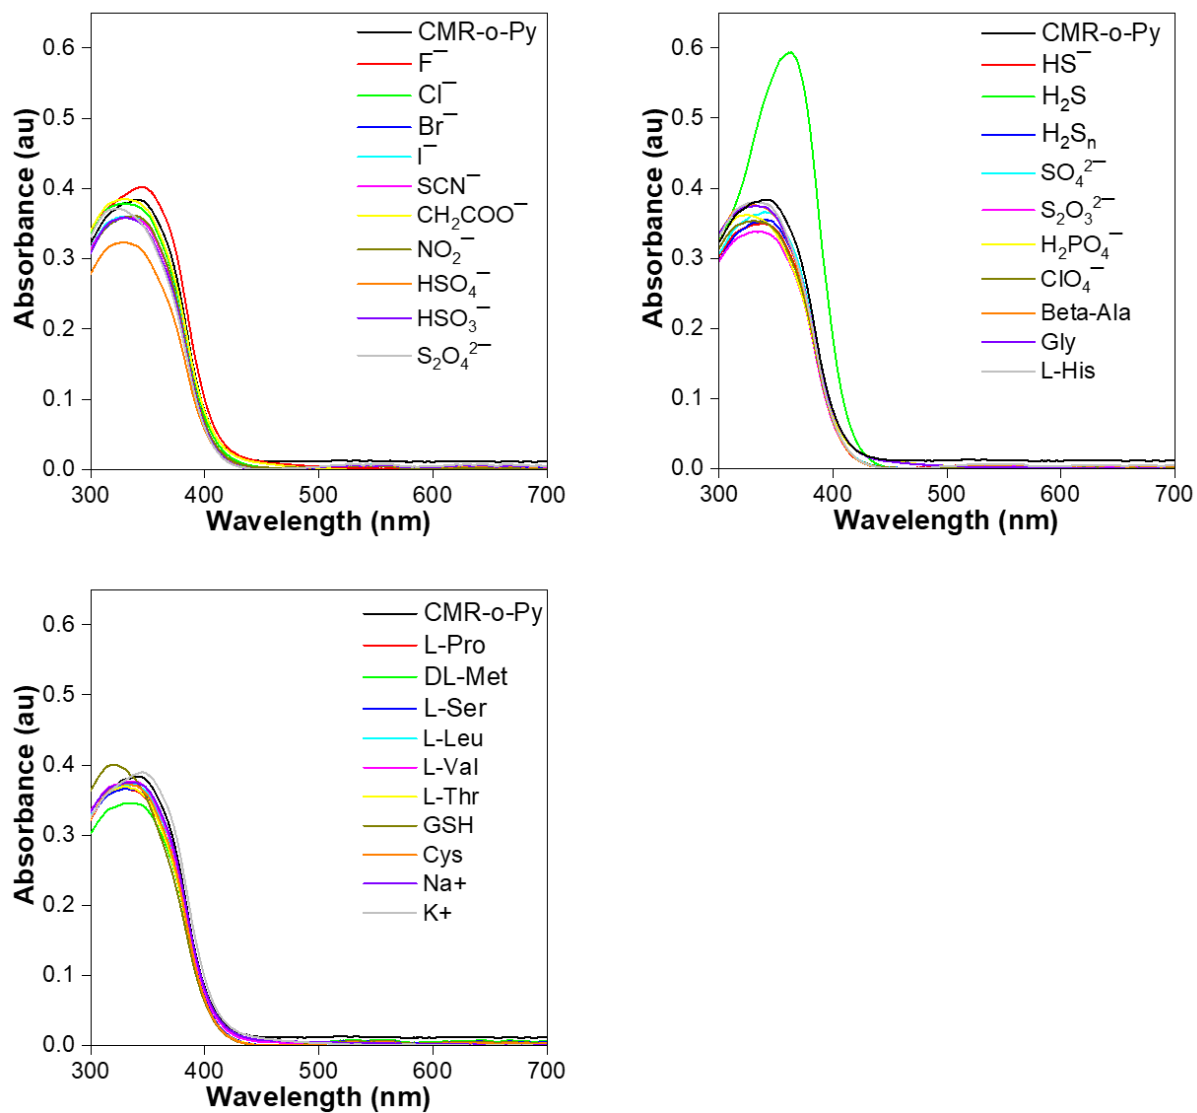

**Figure S15.** UV-vis absorption spectra of CMR-*o*-Py nanoaggregates in DMSO/PBS (1/9, v/v; pH = 7.4) mixture solutions (100 μM) with different sulfide substances.

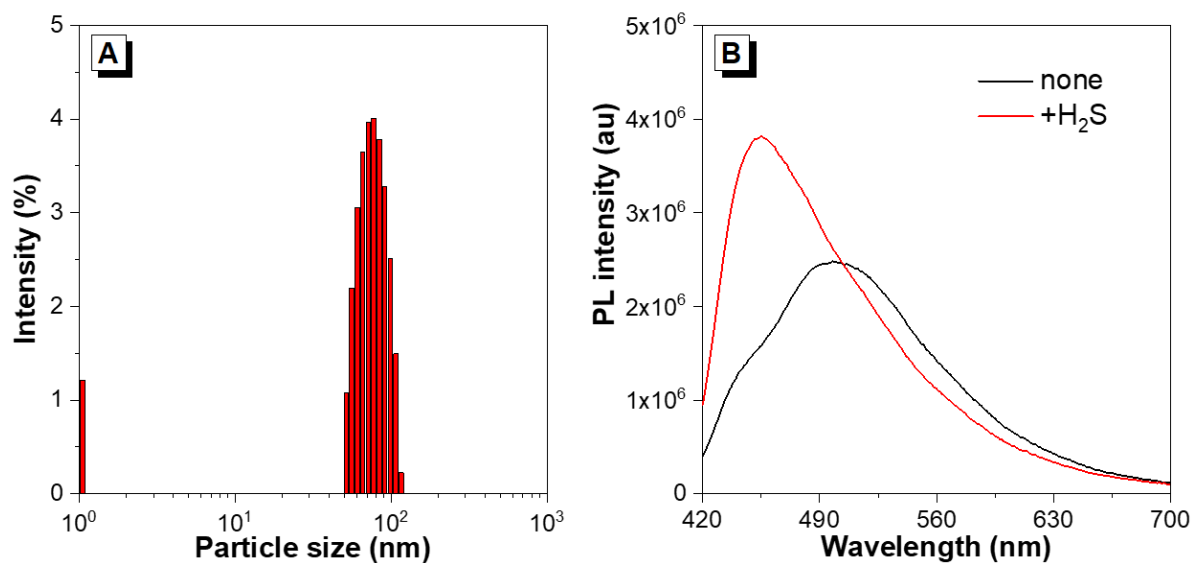

**Figure S16.** (A) DLS analysis of CMR-*o*-Py nanoaggregates in DMSO/PBS (4/6, v/v; pH = 7.4) mixture solutions (100  $\mu$ M) and (B) their PL spectra without and with H<sub>2</sub>S (1 mM).

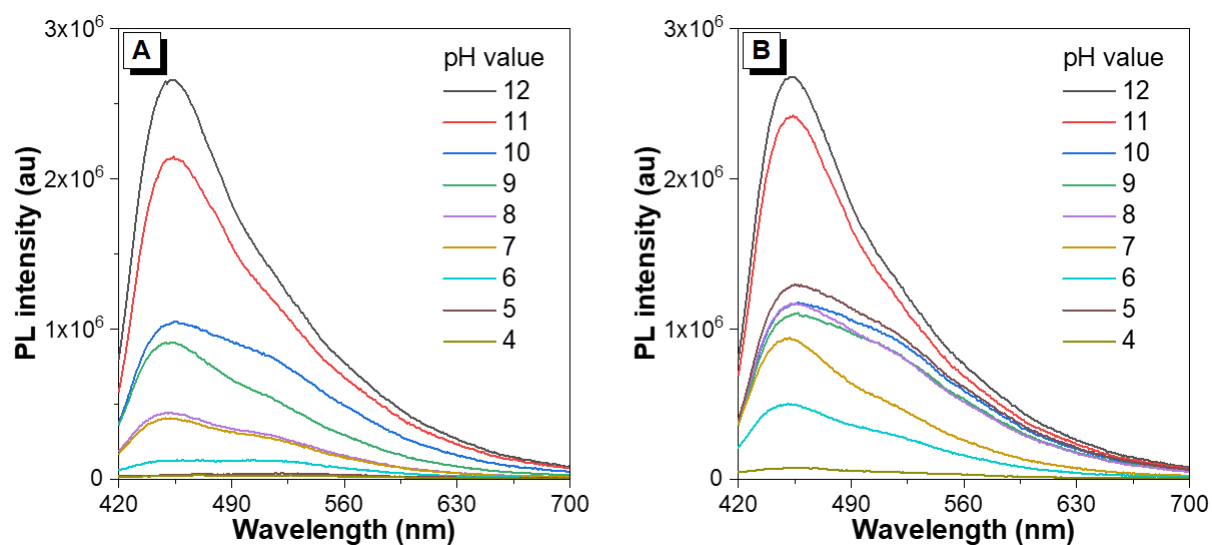

**Figure S17.** PL spectra of CMR-*o*-Py nanoaggregates (100  $\mu$ M in DMSO/PBS, 1/9, v/v; pH = 7.4) in different pH values (A) without and (B) with H<sub>2</sub>S (1 mM). Excitation wavelength: 405 nm; excitation slit: 1 nm; emission slit: 5 nm.

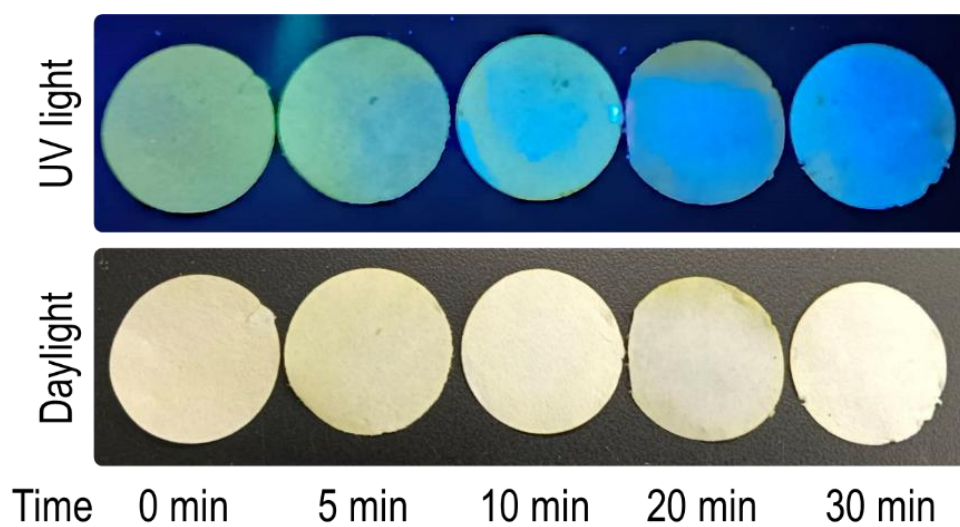

**Figure S18.** Photographs of CMR-*o*-Py nanoaggregates-adsorbed filter papers sensing H<sub>2</sub>S gas during different times.

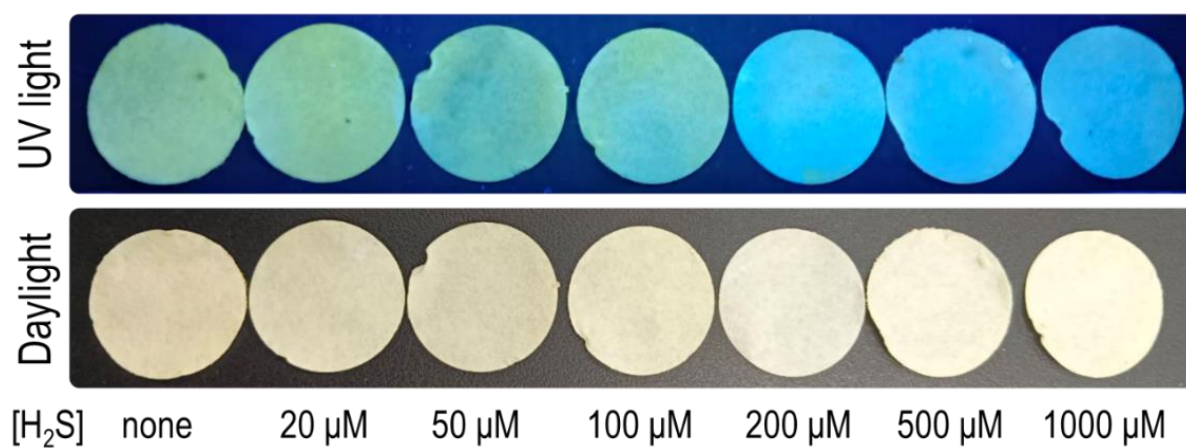

**Figure S19.** Photographs of CMR-*o*-Py nanoaggregates-adsorbed filter papers sensing different H<sub>2</sub>S concentrations.

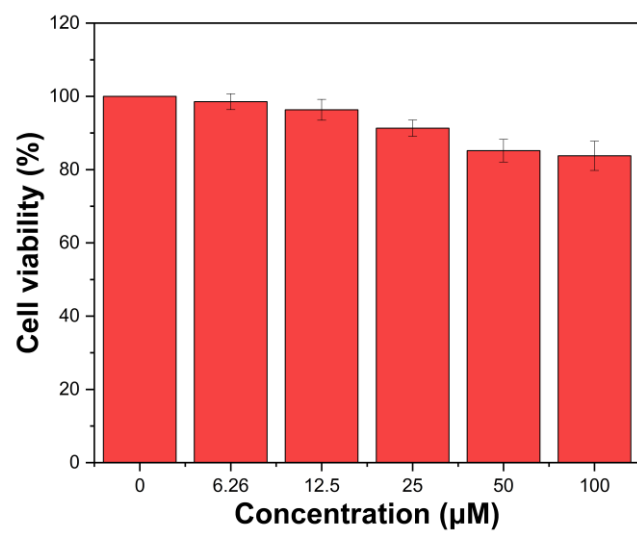

**Figure S20.** Cell viability of CMR-*o*-Py nanoaggregates with different concentrations.

**Table S1.** Calculation data of coumarin-based AIEgens in  $S_0$  state.

| Molecules         | States   | Configurations                                                                                                | $E$ (eV) | $\lambda$ (nm) | $f_{os}$ |
|-------------------|----------|---------------------------------------------------------------------------------------------------------------|----------|----------------|----------|
| CMR-Ph            | $S_{01}$ | H-1 $\rightarrow$ L (3%), H $\rightarrow$ L (91%),<br>H $\rightarrow$ L+1 (5%)                                | 3.26     | 379.78         | 0.16     |
|                   | $S_{02}$ | H-1 $\rightarrow$ L (7%), H-1 $\rightarrow$ L+1 (5%),<br>H $\rightarrow$ L (8%), H $\rightarrow$ L+1 (79%)    | 3.68     | 337.32         | 0.52     |
|                   | $S_{03}$ | H-1 $\rightarrow$ L (74%), H-1 $\rightarrow$ L+1 (4%),<br>H $\rightarrow$ L+1 (14%), H $\rightarrow$ L+3 (4%) | 3.96     | 313.05         | 0.42     |
| CMR- <i>o</i> -Py | $S_{01}$ | H-1 $\rightarrow$ L (7%), H $\rightarrow$ L (85%),<br>H $\rightarrow$ L+1 (7%)                                | 3.43     | 361.98         | 0.18     |
|                   | $S_{02}$ | H-1 $\rightarrow$ L (22%), H-1 $\rightarrow$ L+1 (7%),<br>H $\rightarrow$ L (13%), H $\rightarrow$ L+1 (55%)  | 3.74     | 331.69         | 0.35     |
|                   | $S_{03}$ | H-1 $\rightarrow$ L (59%), H $\rightarrow$ L+1 (34%),<br>H $\rightarrow$ L+3 (3%)                             | 3.99     | 310.49         | 0.65     |
| CMR- <i>m</i> -Py | $S_{01}$ | H-1 $\rightarrow$ L (6%), H $\rightarrow$ L (87%),<br>H $\rightarrow$ L+1 (6%)                                | 3.38     | 367.02         | 0.20     |
|                   | $S_{02}$ | H-1 $\rightarrow$ L (18%), H-1 $\rightarrow$ L+1 (6%),<br>H $\rightarrow$ L (11%), H $\rightarrow$ L+1 (63%)  | 3.69     | 335.91         | 0.38     |
|                   | $S_{03}$ | H-1 $\rightarrow$ L (64%), H $\rightarrow$ L+1 (27%),<br>H $\rightarrow$ L+3 (3%)                             | 3.96     | 313.21         | 0.52     |
| CMR- <i>p</i> -Py | $S_{01}$ | H-1 $\rightarrow$ L (12%), H $\rightarrow$ L (78%),<br>H $\rightarrow$ L+1 (8%)                               | 3.52     | 352.19         | 0.21     |
|                   | $S_{02}$ | H-1 $\rightarrow$ L (31%), H-1 $\rightarrow$ L+1 (6%),<br>H $\rightarrow$ L (20%), H $\rightarrow$ L+1 (41%)  | 3.73     | 332.16         | 0.24     |
|                   | $S_{03}$ | H-1 $\rightarrow$ L (48%), H $\rightarrow$ L+1 (47%),<br>H $\rightarrow$ L+3 (2%)                             | 4.02     | 308.56         | 0.72     |

\* Calculated with TD-DFT at the level of B3LYP/6-31G\*.  $S_{01}$ ,  $S_{01}$ , and  $S_{03}$  denoted the first, second, and third vertical transition from the  $S_0$  state to the  $S_1$ ,  $S_2$ , and  $S_3$ , respectively, and  $f_{os}$  denoted oscillator strength between the ground and excited states.



**Table S2.** Calculated data of coumarin-based AIEgens in S<sub>1</sub> state.

| Molecules         | Excited states  | Configurations            | <i>E</i> (eV) | $\lambda$ (nm) | <i>f</i> <sub>os</sub> |
|-------------------|-----------------|---------------------------|---------------|----------------|------------------------|
| CMR-Ph            | S <sub>10</sub> | H → L (98%)               | 2.44          | 507.84         | 0.07                   |
| CMR- <i>o</i> -Py | S <sub>10</sub> | H → L (96%), H → L+1 (2%) | 2.60          | 476.07         | 0.08                   |
| CMR- <i>m</i> -Py | S <sub>10</sub> | H → L (97%)               | 2.56          | 483.92         | 0.08                   |
| CMR- <i>p</i> -Py | S <sub>10</sub> | H → L (96%), H → L+1 (2%) | 2.67          | 464.37         | 0.08                   |

\* Calculated with TD-DFT at the level of B3LYP/6-31G\*. S<sub>10</sub> denoted the first vertical radiation from the S<sub>1</sub> state to the S<sub>0</sub> state, and *f*<sub>os</sub> denoted oscillator strength between the ground and excited states.

**Table S3.** Molecular dipole moments of coumarin-based AIEgens in S<sub>0</sub> and S<sub>1</sub> states.

| Molecules         | States         | X (Debye) | Y (Debye) | Z (Debye) | Total (Debye) |
|-------------------|----------------|-----------|-----------|-----------|---------------|
| CMR-Ph            | S <sub>0</sub> | -0.1818   | -2.0241   | -0.0433   | 2.0327        |
|                   | S <sub>1</sub> | -0.1818   | -2.0241   | -0.0433   | 2.0327        |
| CMR- <i>o</i> -Py | S <sub>0</sub> | -0.1226   | -3.8467   | 0.0002    | 3.8487        |
|                   | S <sub>1</sub> | -5.5749   | -1.5321   | -0.0001   | 5.7816        |
| CMR- <i>m</i> -Py | S <sub>0</sub> | -2.3291   | -3.6224   | 0.0001    | 4.3066        |
|                   | S <sub>1</sub> | -4.4721   | -3.5658   | 0         | 5.7197        |
| CMR- <i>p</i> -Py | S <sub>0</sub> | -3.5393   | -1.5697   | 0.0001    | 3.8717        |
|                   | S <sub>1</sub> | -2.104    | -3.59     | 0         | 4.1611        |

\* Calculated with TD-DFT as the level of B3LYP/6-31G\*.

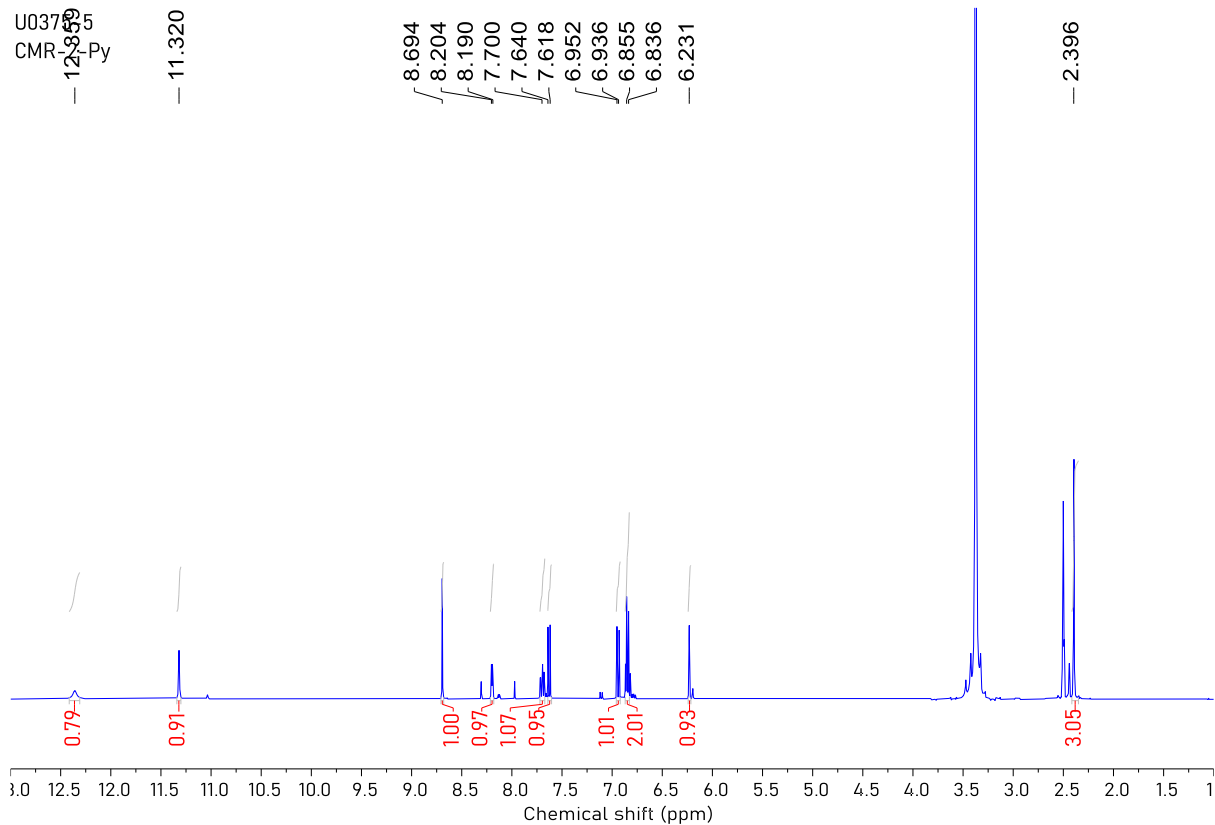

<sup>1</sup>H NMR spectrum of CMR-*o*-Py.

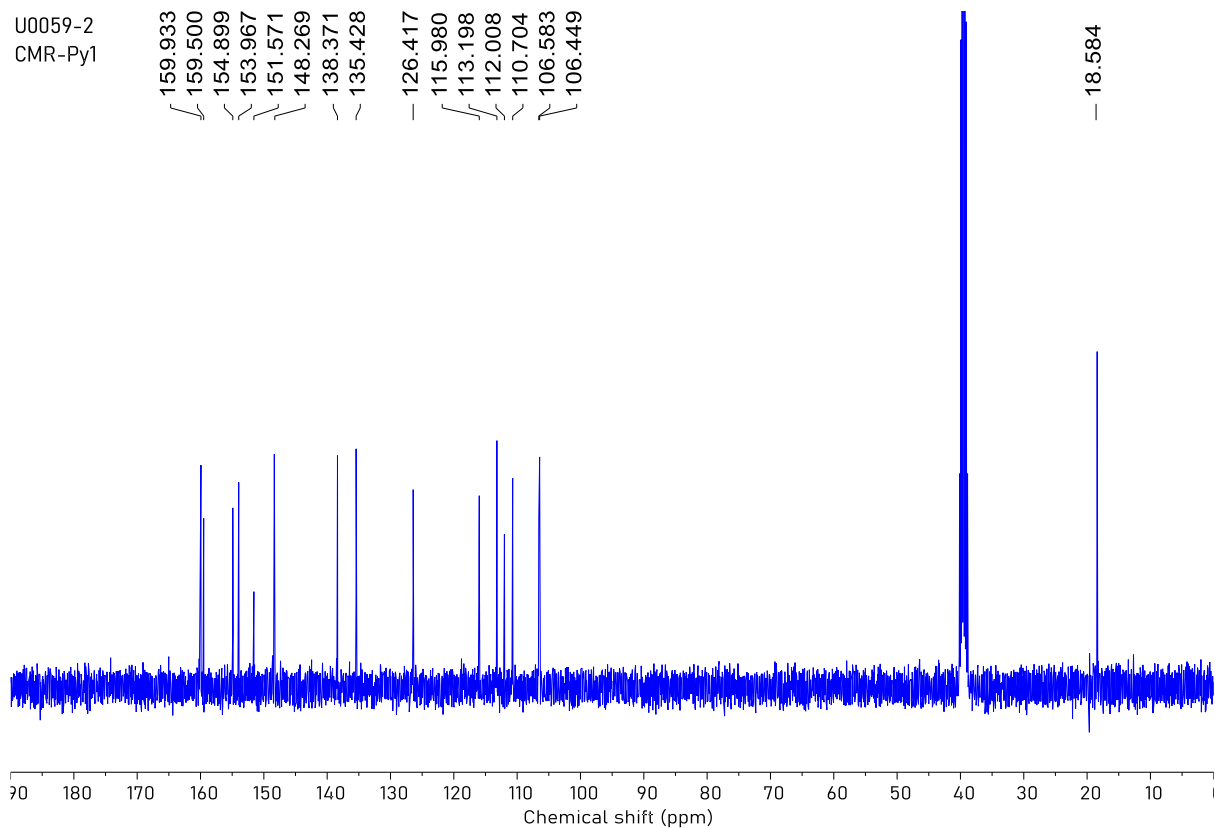

<sup>13</sup>C NMR spectrum of CMR-*o*-Py.

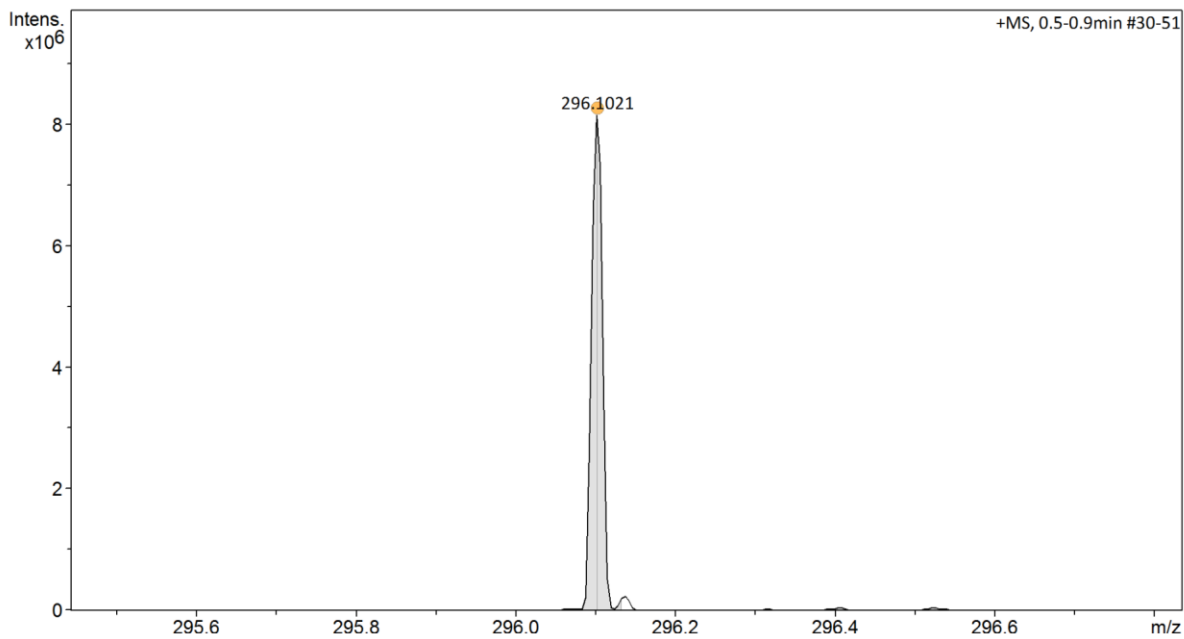

HRMS spectrum of CMR-*o*-Py.

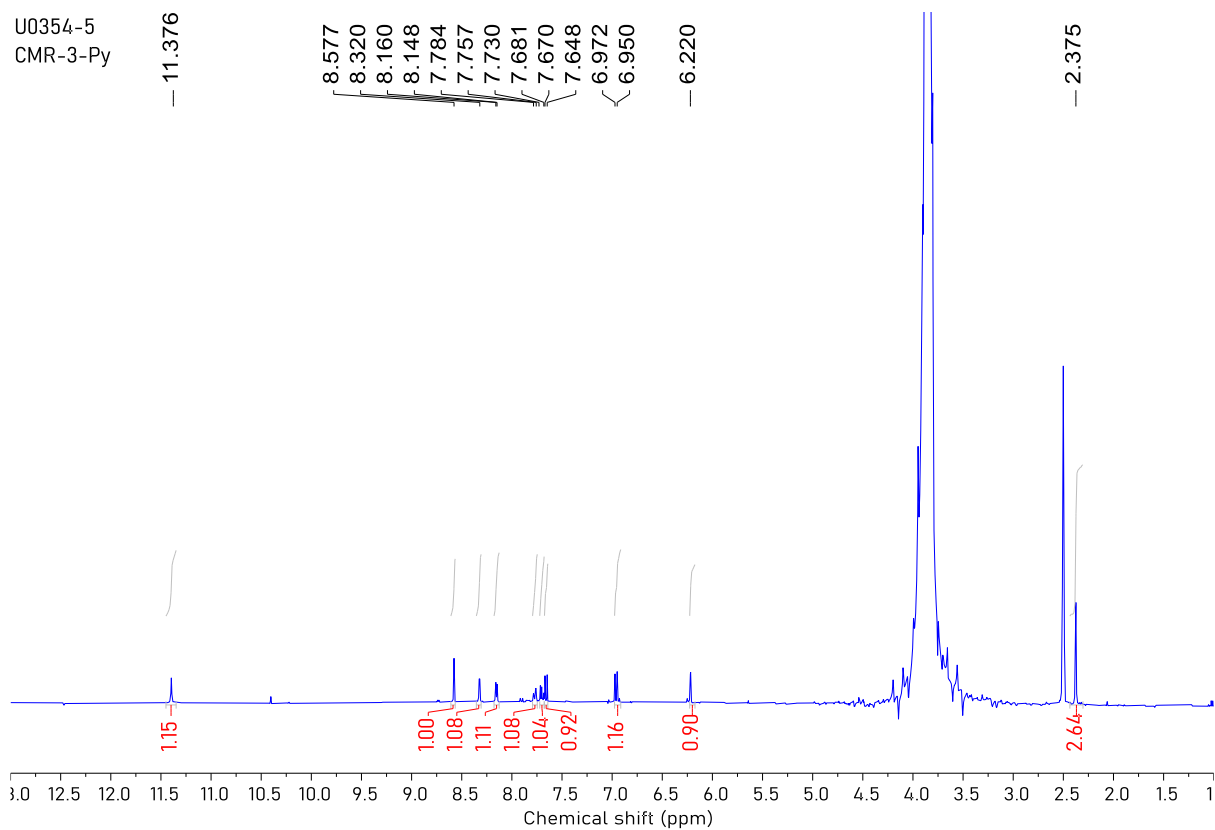

<sup>1</sup>H NMR spectrum of CMR-*m*-Py.

U0059-3  
CMR-Py2

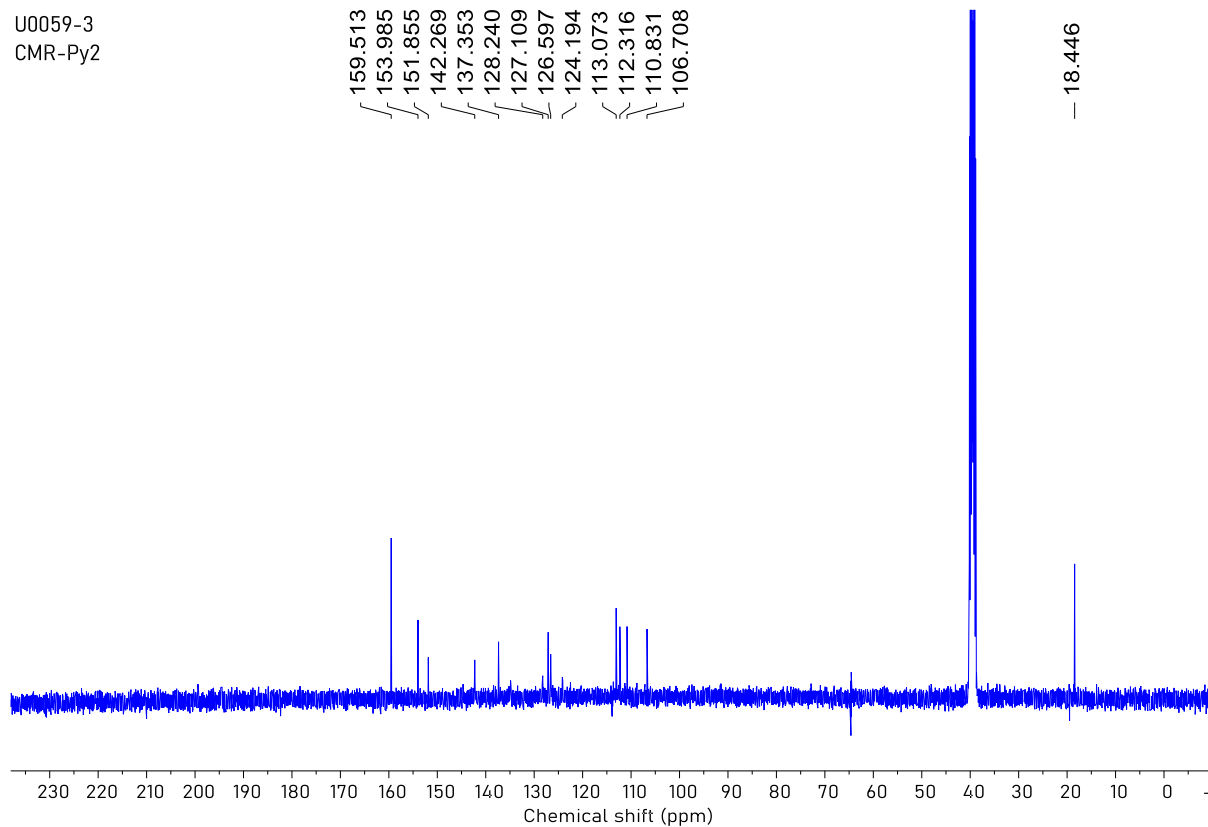

$^{13}\text{C}$  NMR spectrum of CMR-*m*-Py.

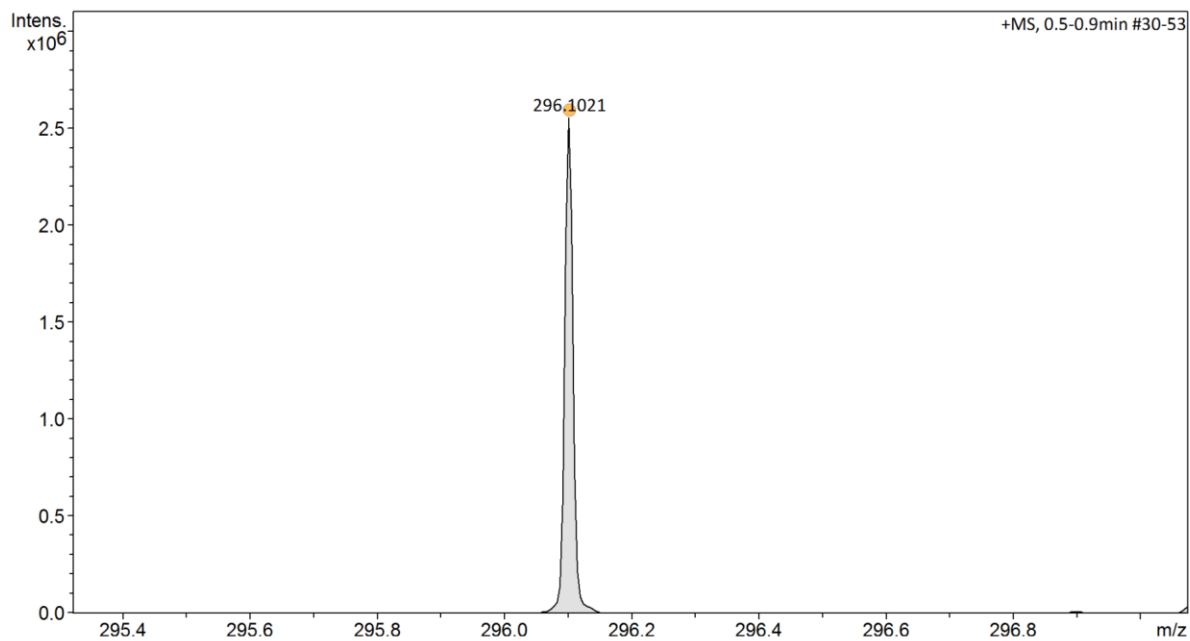

HRMS spectrum of CMR-*m*-Py.

U0354-6  
CMR-4-Py

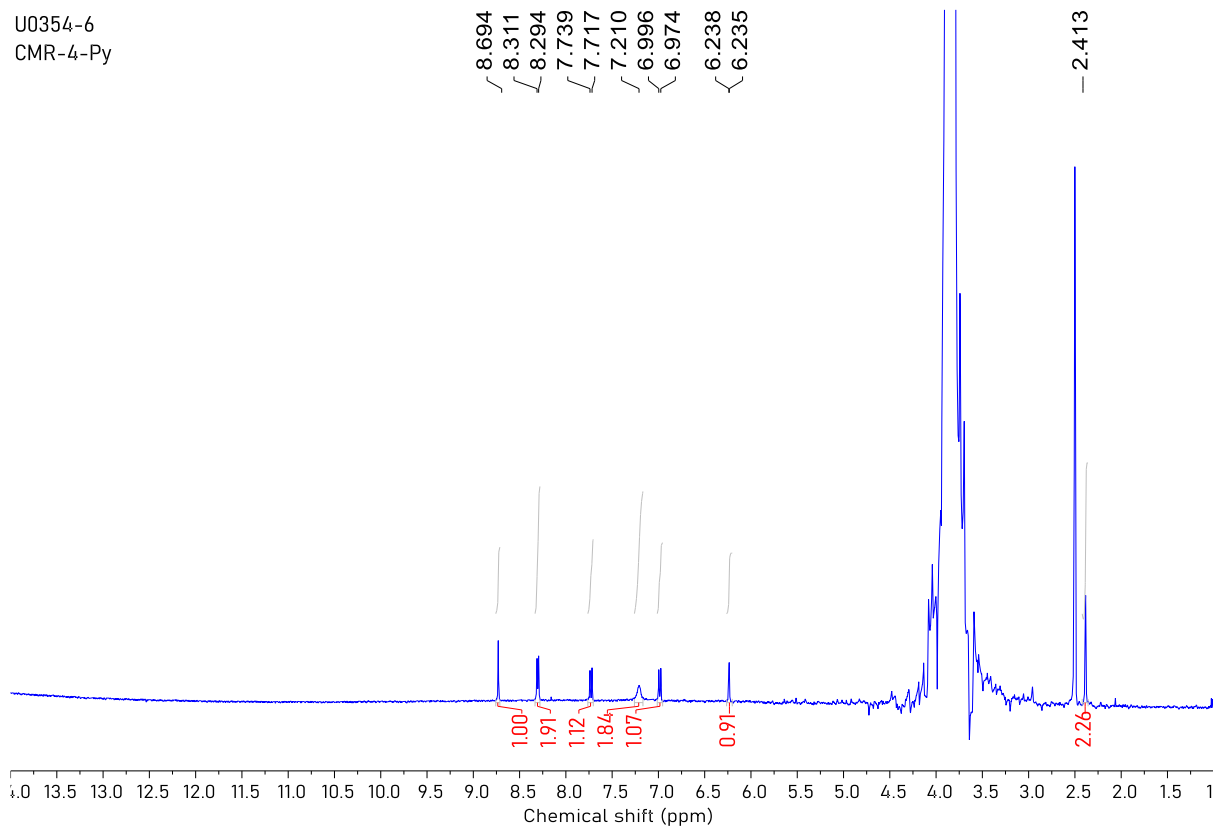

<sup>1</sup>H NMR spectrum of CMR-*p*-Py.

U0059-4  
CMR-Py3

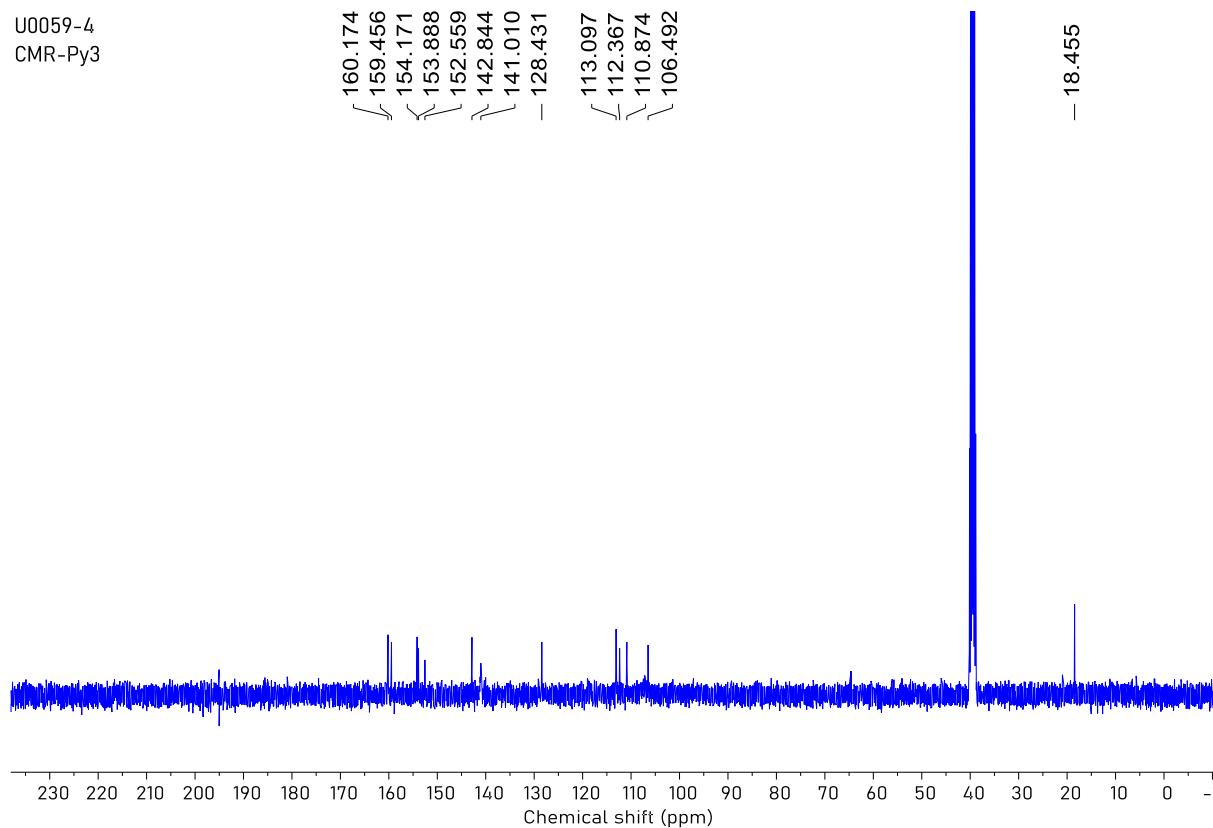

<sup>13</sup>C NMR spectrum of CMR-*p*-Py.

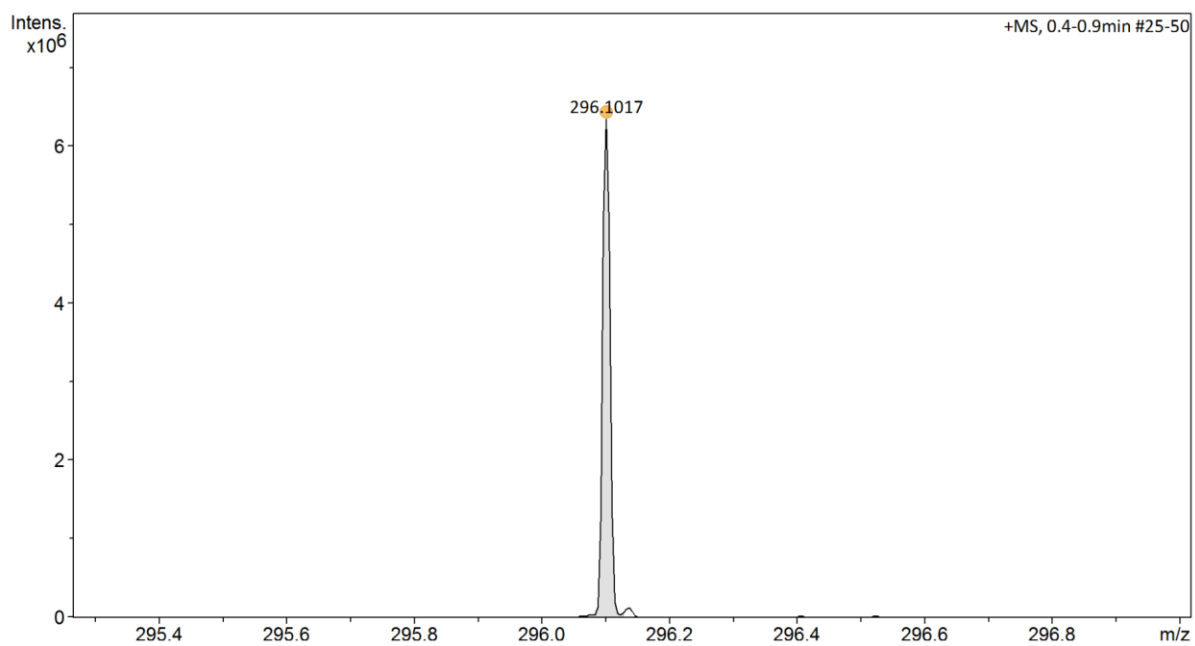

HRMS spectrum of CMR-*p*-Py.

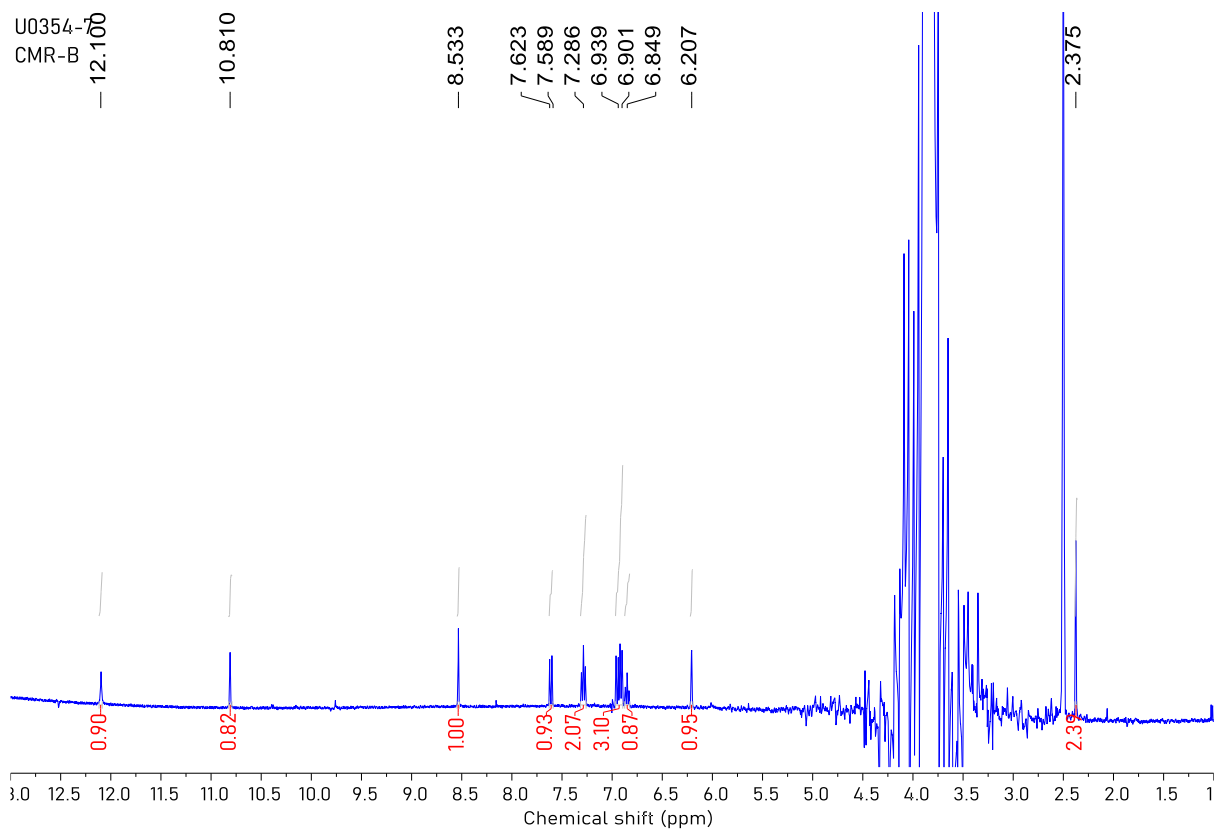

<sup>1</sup>H NMR spectrum of CMR-Ph.

U0059-1  
CMR-B

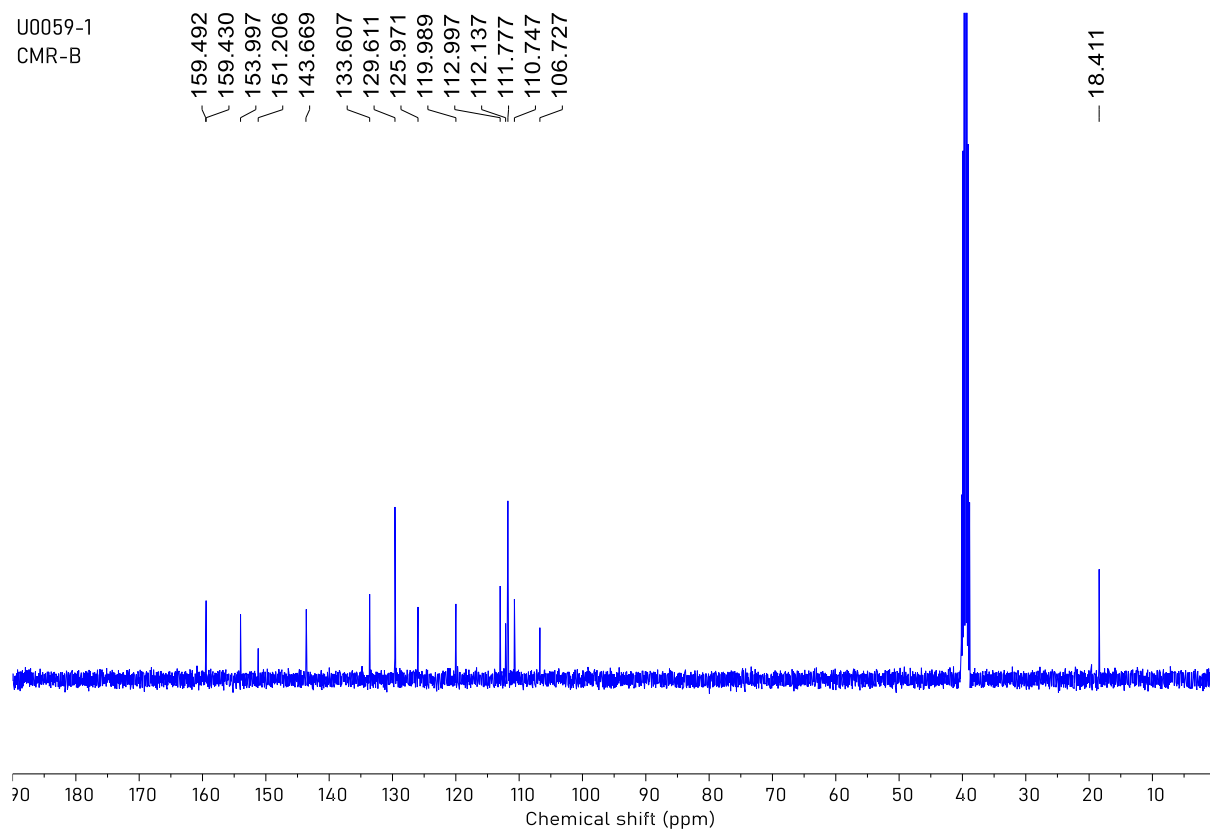

$^{13}\text{C}$  NMR spectrum of CMR-Ph.

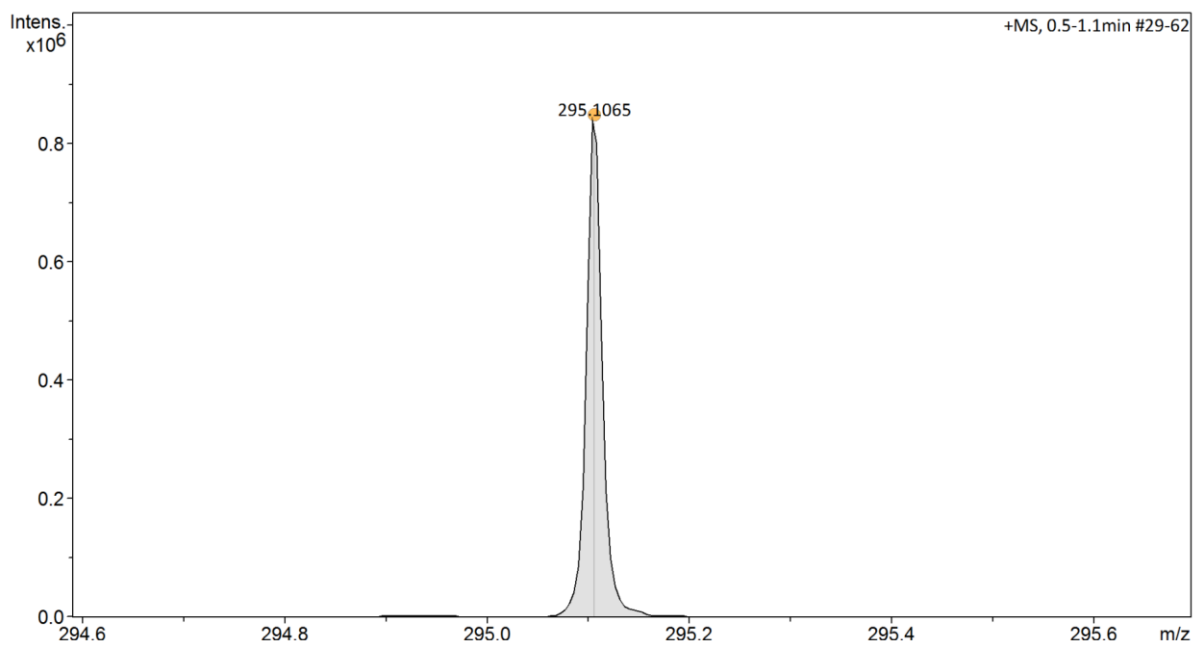

HRMS spectrum of CMR-Ph.
